# Supplementary material for: NH3and (NH2)1−as ligands in yttrium metallocene chemistry
Source: Royal Society of Chemistry journal article supplement (doi:10.1039/c8dt00543e), 2018-01-01
Supplement: c8dt00543e1.pdf [file c8dt00543e1.pdf]

## Supporting Information

### **NH<sub>3</sub> and (NH<sub>2</sub>)<sub>1</sub><sup>-</sup> as Ligands in Yttrium Metallocene Chemistry**

Monica D. Boshart, Joseph W. Ziller, William J. Evans

Department of Chemistry, University of California, Irvine, CA 92697-2025

## Table of Contents

|                                                                       |   |
|-----------------------------------------------------------------------|---|
| Table S1, Crystallographic Details.....                               | 3 |
| Table S2, Selected bond lengths (Å) and angles (°) for <b>1</b> ..... | 4 |
| Table S3, Selected bond lengths (Å) and angles (°) for <b>2</b> ..... | 5 |
| X-ray Data Collection, Structure Solution and Refinement.....         | 6 |
| References.....                                                       | 8 |

**Table S1.** Crystallographic details for  $(C_5Me_5)_2Y(NH_2)(THF)$ , **1** and  $[(C_5Me_5)_2Y(NH_3)(THF)][BPh_4]$ , **2**.

|                                            | <b>1</b>                            | <b>2</b>                             |
|--------------------------------------------|-------------------------------------|--------------------------------------|
| Empirical formula                          | C <sub>24</sub> H <sub>40</sub> YNO | C <sub>48</sub> H <sub>61</sub> BYNO |
| Formula weight                             | 447.48                              | 767.69                               |
| Temperature (K)                            | 88(2)                               | 128(2)                               |
| Space group                                | <i>P2</i> <sub>1</sub>              | <i>P2</i> <sub>1/n</sub>             |
| <i>a</i> (Å)                               | 8.3916(3)                           | 11.7992(9)                           |
| <i>b</i> (Å)                               | 16.1829(6)                          | 22.5790(18)                          |
| <i>c</i> (Å)                               | 9.2225(3)                           | 15.3847(12)                          |
| $\alpha$ (°)                               | 90                                  | 90                                   |
| $\beta$ (°)                                | 111.3610(4)                         | 91.7762(10)                          |
| $\gamma$ (°)                               | 90                                  | 90                                   |
| Volume (Å <sup>3</sup> )                   | 1166.38(7)                          | 4096.7(6)                            |
| <i>Z</i>                                   | 2                                   | 4                                    |
| $\rho_{\text{calcd}}$ (Mg/m <sup>3</sup> ) | 1.274                               | 1.254                                |
| $\mu$ (mm <sup>-1</sup> )                  | 2.513                               | 1.460                                |
| <i>R1</i> <sup>a</sup>                     | 0.0212                              | 0.0336                               |
| <i>wR2</i> <sup>b</sup>                    | 0.0517                              | 0.0894                               |

$${}^a R1 = \Sigma ||F_o| - |F_c|| / \Sigma |F_o|. \quad {}^b wR2 = [\Sigma [w(F_o^2 - F_c^2)^2] / \Sigma [w(F_o^2)]]^{1/2}$$

**Table S2.** Selected bond lengths (Å) and angles (°) for (C<sub>5</sub>Me<sub>5</sub>)<sub>2</sub>Y(NH<sub>2</sub>)(THF), **1**.

---

|                |            |
|----------------|------------|
| Y(1)-Cnt1      | 2.402      |
| Y(1)-Cnt2      | 2.407      |
| Y(1)-N(1)      | 2.226(2)   |
| Y(1)-O(1)      | 2.3857(18) |
| Y(1)-C(1)      | 2.668(3)   |
| Y(1)-C(15)     | 2.669(3)   |
| Y(1)-C(11)     | 2.671(3)   |
| Y(1)-C(5)      | 2.672(3)   |
| Y(1)-C(2)      | 2.683(3)   |
| Y(1)-C(14)     | 2.695(3)   |
| Y(1)-C(4)      | 2.702(3)   |
| Y(1)-C(3)      | 2.708(3)   |
| Y(1)-C(13)     | 2.713(3)   |
| Y(1)-C(12)     | 2.713(2)   |
| Cnt1-Y(1)-N(1) | 104.4      |
| Cnt1-Y(1)-O(1) | 104.5      |
| Cnt1-Y(1)-N(1) | 105.3      |
| Cnt1-Y(1)-O(1) | 103.9      |
| Cnt1-Y(1)-Cnt2 | 137.8      |
| N(1)-Y(1)-O(1) | 91.71(8)   |

**Table S3.** Selected bond lengths (Å) and angles (°) for [(C<sub>5</sub>Me<sub>5</sub>)<sub>2</sub>Y(NH<sub>3</sub>)(THF)][BPh<sub>4</sub>], **2**.

---

|                |            |
|----------------|------------|
| Y(1)-Cnt1      | 2.358      |
| Y(1)-Cnt2      | 2.366      |
| Y(1)-O(1)      | 2.3530(12) |
| Y(1)-N(1)      | 2.4757(16) |
| Y(1)-C(4)      | 2.6356(18) |
| Y(1)-C(12)     | 2.6386(18) |
| Y(1)-C(3)      | 2.6402(18) |
| Y(1)-C(1)      | 2.6552(19) |
| Y(1)-C(11)     | 2.6552(18) |
| Y(1)-C(5)      | 2.6567(18) |
| Y(1)-C(13)     | 2.6605(18) |
| Y(1)-C(2)      | 2.6630(18) |
| Y(1)-C(14)     | 2.6639(18) |
| Y(1)-C(15)     | 2.6671(18) |
| Cnt1-Y(1)-N(1) | 103.3      |
| Cnt1-Y(1)-O(1) | 104.0      |
| Cnt2-Y(1)-N(1) | 105.1      |
| Cnt2-Y(1)-O(1) | 104.7      |
| Cnt1-Y(1)-Cnt2 | 138.8      |
| O(1)-Y(1)-N(1) | 90.93(5)   |

## X-ray Data Collection, Structure Solution and Refinement

For  $(C_5Me_5)_2Y(NH_2)(THF)$ , **1**: A colorless crystal of approximate dimensions 0.275 x 0.312 x 0.426 mm was mounted on a glass fiber and transferred to a Bruker SMART APEX II diffractometer. The APEX2<sup>1</sup> program package was used to determine the unit-cell parameters and for data collection (20 sec/frame scan time for a sphere of diffraction data). The raw frame data was processed using SAINT<sup>2</sup> and SADABS<sup>3</sup> to yield the reflection data file. Subsequent calculations were carried out using the SHELXTL<sup>4</sup> program. The diffraction symmetry was  $2/m$  and the systematic absences were consistent with the monoclinic space groups  $P2_1$  and  $P2_1/m$ . It was later determined that space group  $P2_1$  was correct. The structure was solved by direct methods and refined on  $F^2$  by full-matrix least-squares techniques. The analytical scattering factors<sup>5</sup> for neutral atoms were used throughout the analysis. Hydrogen atoms H(1) and H(2) were located from a difference-Fourier map and refined ( $x, y, z$  and  $U_{iso}$ ) with  $d(N-H) = 0.88 \text{ \AA}$ . The remaining hydrogen atoms were included using a riding model. At convergence,  $wR2 = 0.0517$  and  $Goof = 1.050$  for 262 variables refined against 5132 data ( $0.78 \text{ \AA}$ ),  $R1 = 0.0212$  for those 4939 data with  $I > 2.0\sigma(I)$ . The absolute structure was assigned by refinement of the Flack<sup>6</sup> parameter.

For  $[(C_5Me_5)_2Y(THF)(NH_3)][BPh_4]$ , **2**: A colorless crystal of approximate dimensions 0.504 x 0.509 x 0.536 mm was mounted on a glass fiber and transferred to a Bruker SMART APEX II diffractometer. The APEX2<sup>1</sup> program package was used to determine the unit-cell parameters and for data collection (10 sec/frame scan time for a sphere of diffraction data). The raw frame data was processed using SAINT<sup>2</sup> and SADABS<sup>3</sup> to yield the reflection data file. Subsequent calculations were carried out using the SHELXTL<sup>4</sup> program. The diffraction symmetry was  $2/m$  and the systematic absences were consistent with the monoclinic space group

$P2_1/n$  that was later determined to be correct. The structure was solved by direct methods and refined on  $F^2$  by full-matrix least-squares techniques. The analytical scattering factors<sup>5</sup> for neutral atoms were used throughout the analysis. Hydrogen atoms H(1), H(2) and H(3) were located from a difference-Fourier map and refined ( $x,y,z$  and  $U_{iso}$ ). The remaining hydrogen atoms were included using a riding model. At convergence,  $wR2 = 0.0894$  and  $Goof = 1.027$  for 491 variables refined against 9027 data ( $0.78\text{\AA}$ ),  $R1 = 0.0336$  for those 7807 data with  $I > 2.0\sigma(I)$ .

Definitions:

$$wR2 = [\Sigma[w(F_o^2 - F_c^2)^2] / \Sigma[w(F_o^2)^2]]^{1/2}$$

$$R1 = \Sigma||F_o| - |F_c|| / \Sigma|F_o|$$

$Goof = S = [\Sigma[w(F_o^2 - F_c^2)^2] / (n-p)]^{1/2}$  where  $n$  is the number of reflections and  $p$  is the total number of parameters refined.

## References

- (1) Bruker AXS, Inc.: Madison, WI 2014.
- (2) Bruker AXS, Inc.: Madison, WI 2013.
- (3) Sheldrick, G. M. Bruker AXS, Inc.: Madison, WI 2014.
- (4) Sheldrick, G. M. Bruker AXS, Inc.: Madison, WI 2014.
- (5) *International Tables for Crystallography*, Vol. C.; Kluwer Academic Publishers: Dordrecht, 1992.
- (6) Parsons, S.; Flack, H. D.; Wagner, T. *Acta Crystallogr. Sect. B Struct. Sci. Cryst. Eng. Mater.* **2013**, *B69*, 249.
